# Supplementary material for: The efficiency of C-4 substituents in activating the β-lactam scaffold towards serine proteases and hydroxide ion
Source: Royal Society of Chemistry journal article supplement (doi:10.1039/b706622h), 2007-01-01
Supplement: b706622h.pdf [file b706622h.pdf]

# Supplementary material

## The efficiency of C-4 substituents in activating the $\beta$ -lactam scaffold towards serine proteases and hydroxide ion

Jalmira Mulchande<sup>a</sup>, Luísa Martins<sup>a</sup>, Rui Moreira<sup>a</sup>, Margarida Archer<sup>b</sup>, Tania F. Oliveira<sup>b</sup>, Jim Iley<sup>c</sup>

a) i-Med-UL, Faculdade de Farmácia, Universidade de Lisboa, Av. Forças Armadas, 1600-083 Lisboa, Portugal; b) Instituto de Tecnologia Química e Biológica, Universidade Nova de Lisboa, ITQB-UNL, Av. República, Apt. 127, 2781-901 Oeiras, Portugal; c) Department of Chemistry, The Open University, Milton Keynes, MK7 6AA, UK

**Table S1**

X-ray data-collection statistics

|                          |                                               |
|--------------------------|-----------------------------------------------|
| Wavelength (Å)           | 0.82                                          |
| Resolution range (Å)     | 37.95 - 1.66                                  |
| Space group              | P2 <sub>1</sub> 2 <sub>1</sub> 2 <sub>1</sub> |
| Unit cell parameters (Å) | a = 50.25, b = 57.94, c = 74.69               |
| Total reflections        | 177649                                        |
| Unique reflections       | 26474                                         |
| Completeness (%)         | 96.9 (79.8)                                   |
| Redundancy               | 4.3 (4.1)                                     |
| R <sub>merge</sub> * (%) | 3.0 (9.3)                                     |
| I/σ (I)                  | 27.4 (14.7)                                   |

Values in parenthesis show the statistics of the highest resolution shell (1.75 - 1.66 Å).

$$* R_{merge} = \frac{\sum_{hkl} \sum_i |I_i(hkl) - \overline{I(hkl)}|}{\sum_{hkl} \sum_i I_i(hkl)}, \text{ where } I_i(hkl) \text{ is the } i^{\text{th}} \text{ measurement.}$$
